# Supplementary material for: Facile preparation of a phenyl-reinforced flexible silica aerogel with excellent thermal stability and fire resistance
Source: Royal Society of Chemistry journal article supplement (doi:10.1039/d1qm00206f), 2021-01-01
Supplement: d1qm00206f1.pdf [file d1qm00206f1.pdf]

## Facile preparation of phenyl-reinforced flexible silica aerogel with excellent thermal stability and fire resistance

Yu Zhang, Qianqian Shen, Xuesha Li, Lili Wang, Chaoyin Nie\*

School of Materials and Energy, Southwest University, Chongqing, 400715, China

\*E-mail: niecy@swu.edu.cn

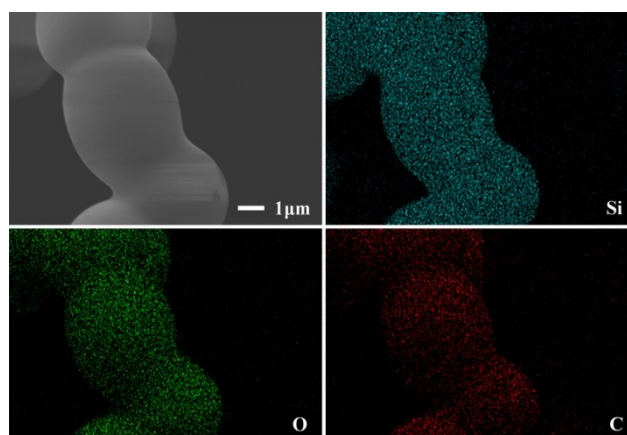

**Figure S1** The elemental mapping of phenyl-enhanced flexible silica aerogel.

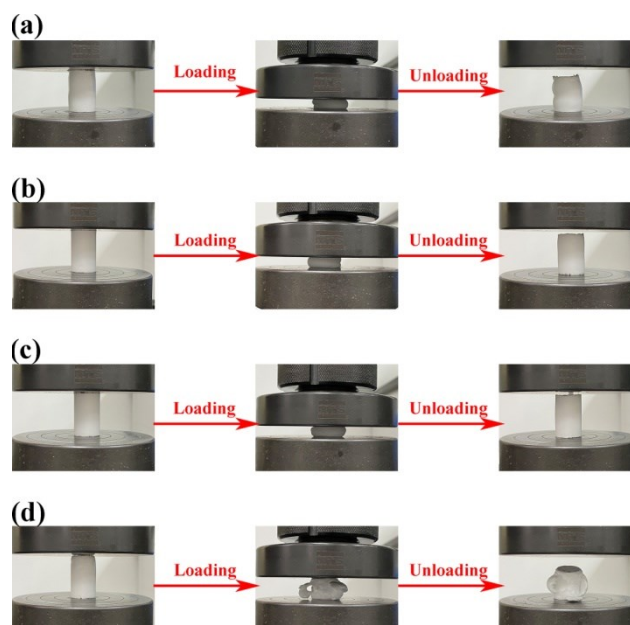

**Figure S2** Spring back properties of the aerogel at 80% strain: (a) P-0, (b) P-0.04, P-0.08 (c) and (d) P-0.16.

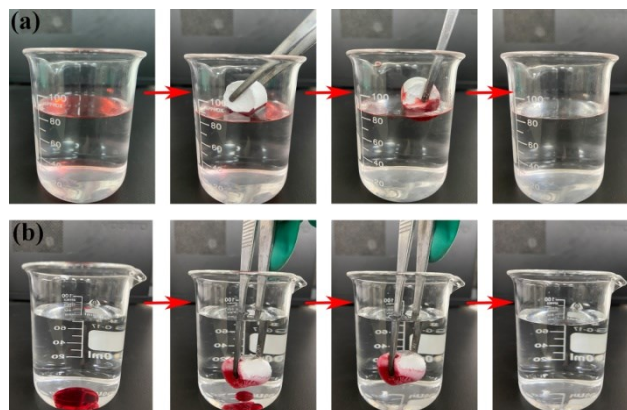

**Figure S3** (a) Adsorption process of oil red O stained engine oil floating on the water by using P-

0.12. (b) Adsorption process of oil red O stained chloroform underwater by using P-0.12.
